# Supplementary material
Source: PubMed Central journal article supplement (PMC6079136)
Supplement: ajtr0010-2004-f8.pdf [file ajtr0010-2004-f8.pdf]

## Prognosis of DTC patients with TX stage

**Supplemental Table 1.** AJCC Cancer Staging Manual, 6th Edition: Protocol for Differentiated Thyroid Carcinoma

| AJCC Staging Protocol for DTC, 6th Edition                                                                                                                                                      |       |       |    |
|-------------------------------------------------------------------------------------------------------------------------------------------------------------------------------------------------|-------|-------|----|
| <b>Primary tumor (T)</b>                                                                                                                                                                        |       |       |    |
| TX Primary tumor cannot be assessed                                                                                                                                                             |       |       |    |
| T0 No evidence of primary tumor                                                                                                                                                                 |       |       |    |
| T1 Tumor 2 cm or less in greatest dimension limited to the thyroid                                                                                                                              |       |       |    |
| T2 Tumor more than 2 cm but not more than 4 cm in greatest dimension limited to the thyroid                                                                                                     |       |       |    |
| T3 Tumor more than 4 cm in greatest dimension limited to the thyroid or any tumor with minimal extrathyroid extension (e.g., extension to the sternothyroid muscle or perithyroid soft tissues) |       |       |    |
| T4a Tumor of any size extending beyond the thyroid capsule to invade subcutaneous soft tissues, larynx, trachea, esophagus, or recurrent laryngeal nerve                                        |       |       |    |
| T4b Tumor invades prevertebral fascia or encases carotid artery or mediastinal vessels                                                                                                          |       |       |    |
| Note: All categories may be subdivided: (a) solitary tumor, (b) multifocal (the largest determines the classification).                                                                         |       |       |    |
| <b>Regional nodes (N)</b>                                                                                                                                                                       |       |       |    |
| NX Regional lymph nodes cannot be assessed                                                                                                                                                      |       |       |    |
| N0 No regional node metastasis                                                                                                                                                                  |       |       |    |
| N1 Regional node involvement                                                                                                                                                                    |       |       |    |
| N1a Nodal metastasis to level VI (pretracheal, paratracheal, and prelaryngeal/Delphian lymph nodes)                                                                                             |       |       |    |
| N1b Metastasis to unilateral, bilateral, or contralateral cervical or cervical or superior mediastinal lymph nodes                                                                              |       |       |    |
| Regional lymph nodes are the central compartment, lateral cervical, and upper mediastinal lymph nodes.                                                                                          |       |       |    |
| <b>Distant metastasis (M)</b>                                                                                                                                                                   |       |       |    |
| MX Distant metastasis cannot be assessed                                                                                                                                                        |       |       |    |
| M0 No distant metastasis                                                                                                                                                                        |       |       |    |
| M1 Distant metastasis                                                                                                                                                                           |       |       |    |
| <b>AJCC Staging grouping</b>                                                                                                                                                                    |       |       |    |
| For patients <45 years                                                                                                                                                                          |       |       |    |
| Stage I                                                                                                                                                                                         | Any T | Any N | M0 |
| Stage II                                                                                                                                                                                        | Any T | Any N | M1 |
| For patients ≥45 years                                                                                                                                                                          |       |       |    |
| Stage I                                                                                                                                                                                         | T1    | N0    | M0 |
| Stage II                                                                                                                                                                                        | T2    | N0    | M0 |
| Stage III                                                                                                                                                                                       | T3    | N0    | M0 |
|                                                                                                                                                                                                 | T1    | N1a   | M0 |
|                                                                                                                                                                                                 | T2    | N1a   | M0 |
| Stage IVa                                                                                                                                                                                       | T3    | N1a   | M0 |
|                                                                                                                                                                                                 | T4a   | N0    | M0 |
|                                                                                                                                                                                                 | T4a   | N1a   | M0 |
| Stage IVb                                                                                                                                                                                       | T1    | N1b   | M0 |
|                                                                                                                                                                                                 | T2    | N1b   | M0 |
|                                                                                                                                                                                                 | T3    | N1b   | M0 |
| Stage IVc                                                                                                                                                                                       | T4a   | N1b   | M0 |
|                                                                                                                                                                                                 | T4b   | Any N | M0 |
| Stage IVc                                                                                                                                                                                       | Any T | Any N | M1 |

## Prognosis of DTC patients with TX stage

**Supplemental Table 2.** AJCC Cancer Staging Manual, 7th Edition: Protocol for Differentiated Thyroid Carcinoma

| AJCC Staging Protocol for DTC, 7th Edition                                                                                                                                            |       |       |    |
|---------------------------------------------------------------------------------------------------------------------------------------------------------------------------------------|-------|-------|----|
| Primary tumor (T)                                                                                                                                                                     |       |       |    |
| TX Primary tumor cannot be assessed                                                                                                                                                   |       |       |    |
| T0 No evidence of primary tumor                                                                                                                                                       |       |       |    |
| T1 ≤2 cm, limited to the thyroid                                                                                                                                                      |       |       |    |
| T1a ≤1 cm                                                                                                                                                                             |       |       |    |
| T1b >1 cm and ≤2 cm                                                                                                                                                                   |       |       |    |
| T2 >2 cm and ≤4 cm, limited to the thyroid                                                                                                                                            |       |       |    |
| T3 >4 cm, limited to the thyroid or any tumor with minimal extra-thyroid extension (e.g., to the sternothyroid muscle or perithyroid soft tissues)                                    |       |       |    |
| T4a Tumor of any size extending beyond the thyroid capsule to invade subcutaneous soft tissues, larynx, trachea, esophagus, or recurrent laryngeal nerve                              |       |       |    |
| T4b Tumor invades prevertebral fascia or encases carotid artery or mediastinal vessels                                                                                                |       |       |    |
| Regional nodes (N)                                                                                                                                                                    |       |       |    |
| NX Regional lymph nodes cannot be assessed                                                                                                                                            |       |       |    |
| N0 No regional node metastasis                                                                                                                                                        |       |       |    |
| N1 Regional node involvement                                                                                                                                                          |       |       |    |
| N1a Nodal metastasis to level VI (pretracheal, paratracheal, and prelaryngeal/Delphian lymph nodes)                                                                                   |       |       |    |
| N1b Nodal metastasis to unilateral, bilateral, or contralateral cervical (Levels I, II, III, IV, or V) or retropharyngeal or cervical or superior mediastinal lymph nodes (Level VII) |       |       |    |
| Distant metastasis (M)                                                                                                                                                                |       |       |    |
| M0 No distant metastasis                                                                                                                                                              |       |       |    |
| M1 Distant metastasis                                                                                                                                                                 |       |       |    |
| AJCC Staging grouping                                                                                                                                                                 |       |       |    |
| For patients <45 years                                                                                                                                                                |       |       |    |
| Stage I                                                                                                                                                                               | Any T | Any N | M0 |
| Stage II                                                                                                                                                                              | Any T | Any N | M1 |
| For patients ≥45 years                                                                                                                                                                |       |       |    |
| Stage I                                                                                                                                                                               | T1    | N0    | M0 |
| Stage II                                                                                                                                                                              | T2    | N0    | M0 |
| Stage III                                                                                                                                                                             | T3    | N0    | M0 |
|                                                                                                                                                                                       | T1-3  | N1a   | M0 |
| Stage IVa                                                                                                                                                                             | T4a   | N0-1a | M0 |
|                                                                                                                                                                                       | T1-4a | N1b   | M0 |
| Stage IVb                                                                                                                                                                             | T4b   | Any N | M0 |
| Stage IVc                                                                                                                                                                             | Any T | Any N | M1 |

**Supplemental Table 3.** Distribution of TX patients according to AJCC Cancer Staging Manual (7th Edition)

|    | Stage      |         |           |
|----|------------|---------|-----------|
|    | I (%)      | II (%)  | IVC (%)   |
| TX | 593 (86.2) | 8 (1.2) | 87 (12.6) |
